# Supplementary material
Source: Springer Nature journal article supplement (https://www.springermedizin.de/resource/supplementary/12995_2007_43_MOESM1_ESM.pdf/9622558)

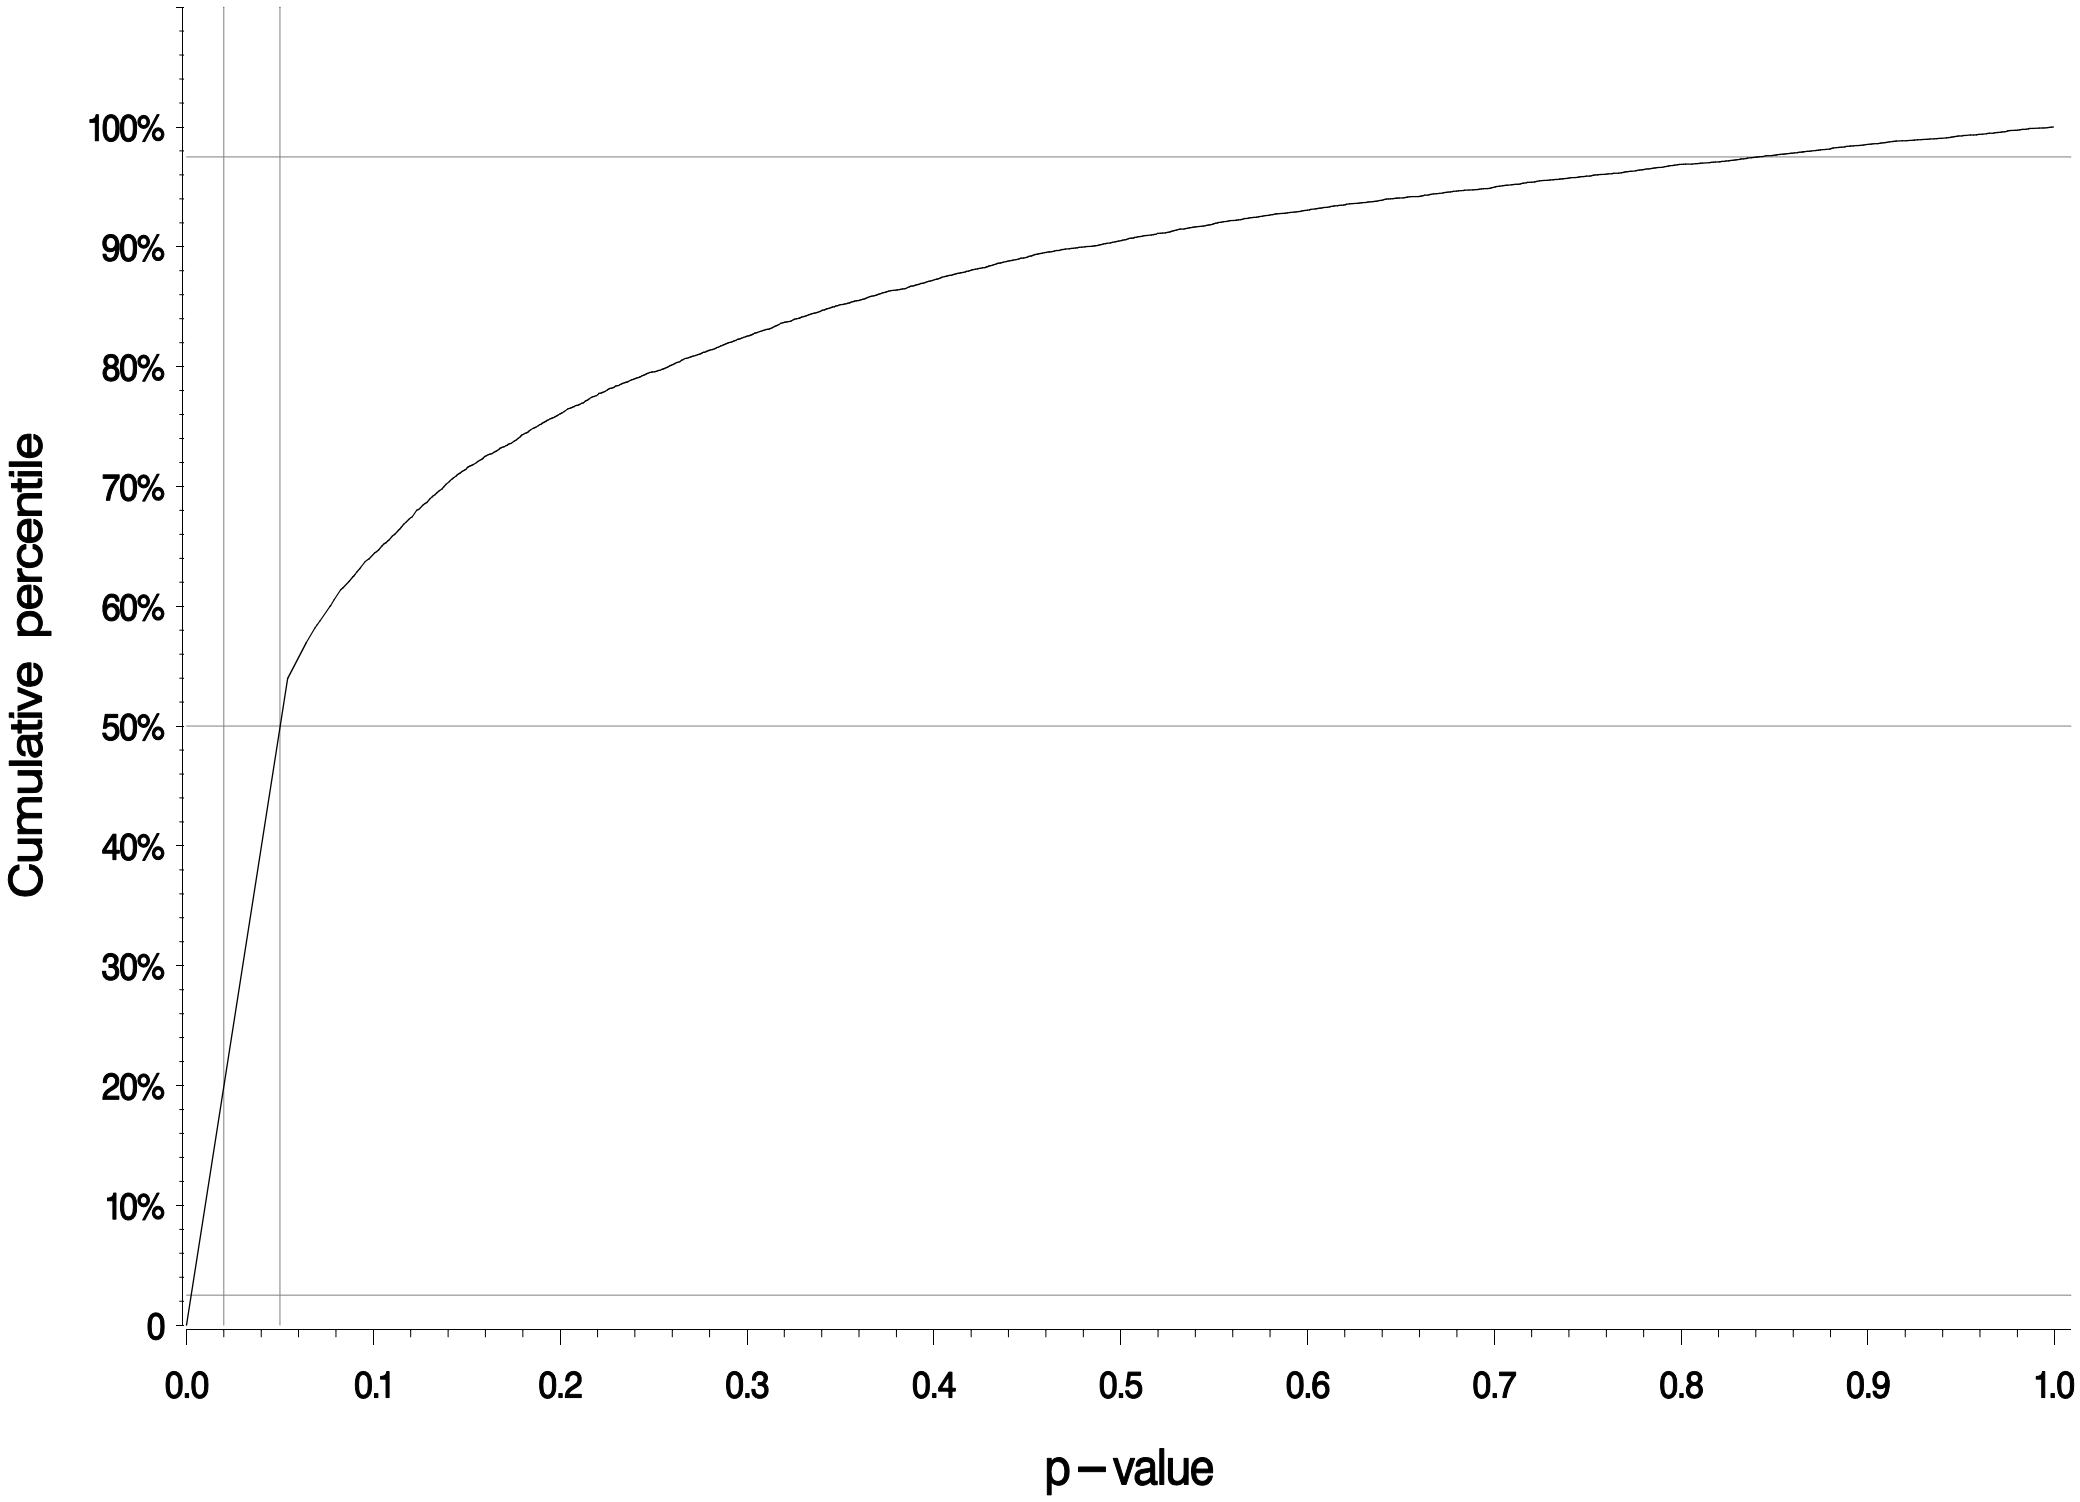

Supplement: MOESM1 [file 9622558]
